# Supplementary material for: New Vaccine Introductions in WHO African Region between 2000 and 2022
Source: MDPI journal article supplement (doi:10.3390/vaccines11111722), 2023-11-16
Supplement: s1 [file s1]

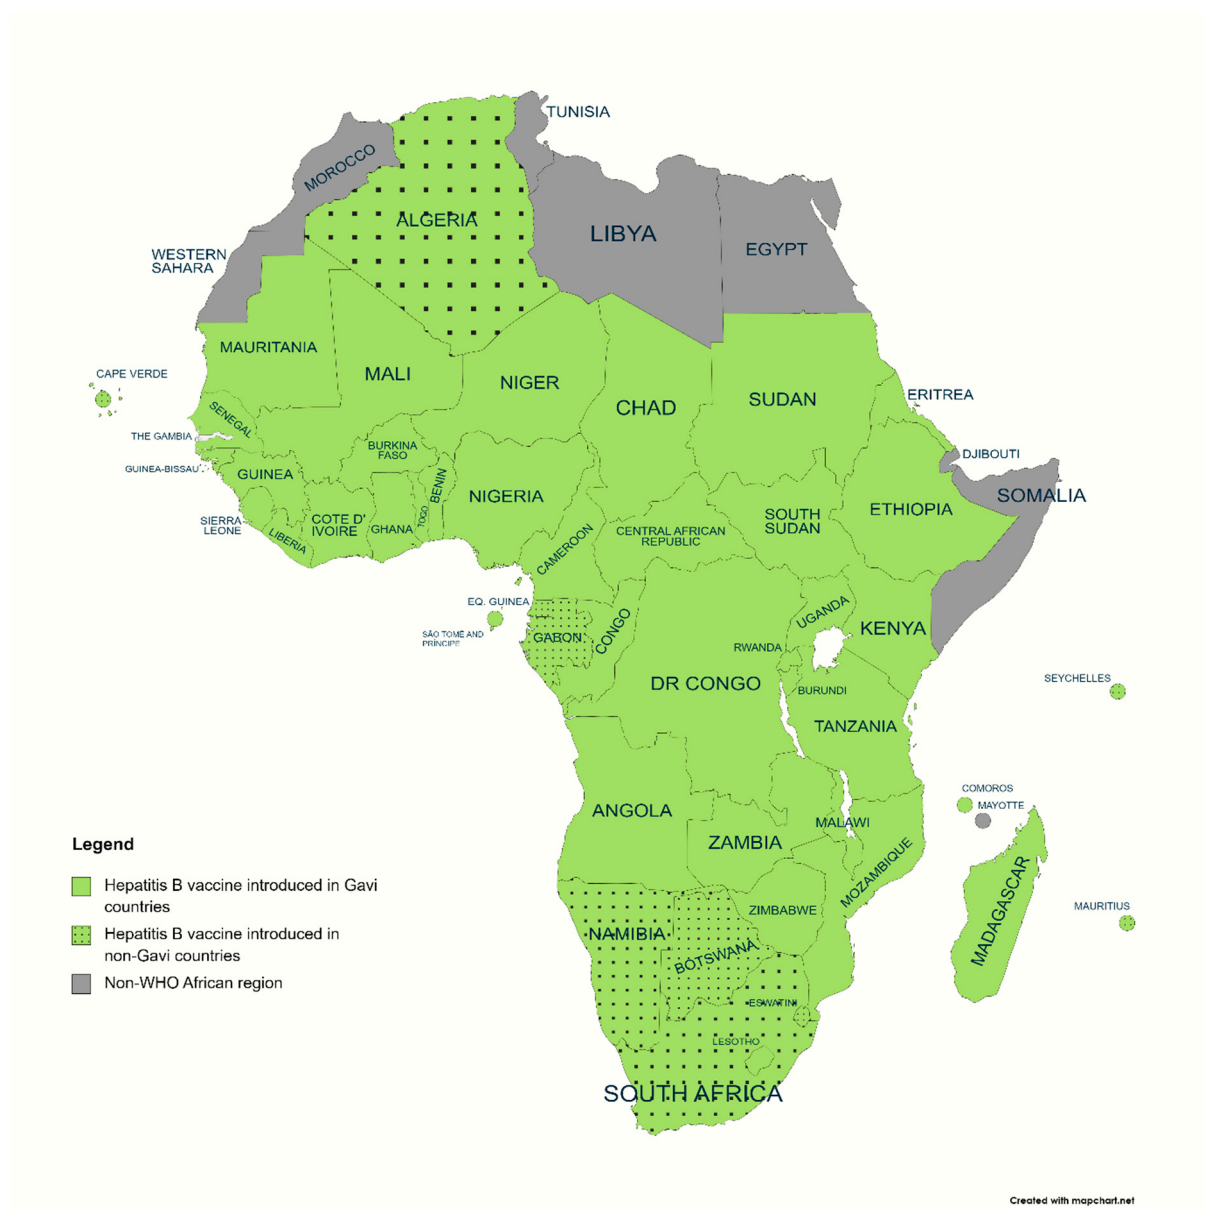

**Figure S1.** Status of Hepatitis B vaccine introduction in the WHO African region as of May 2022.

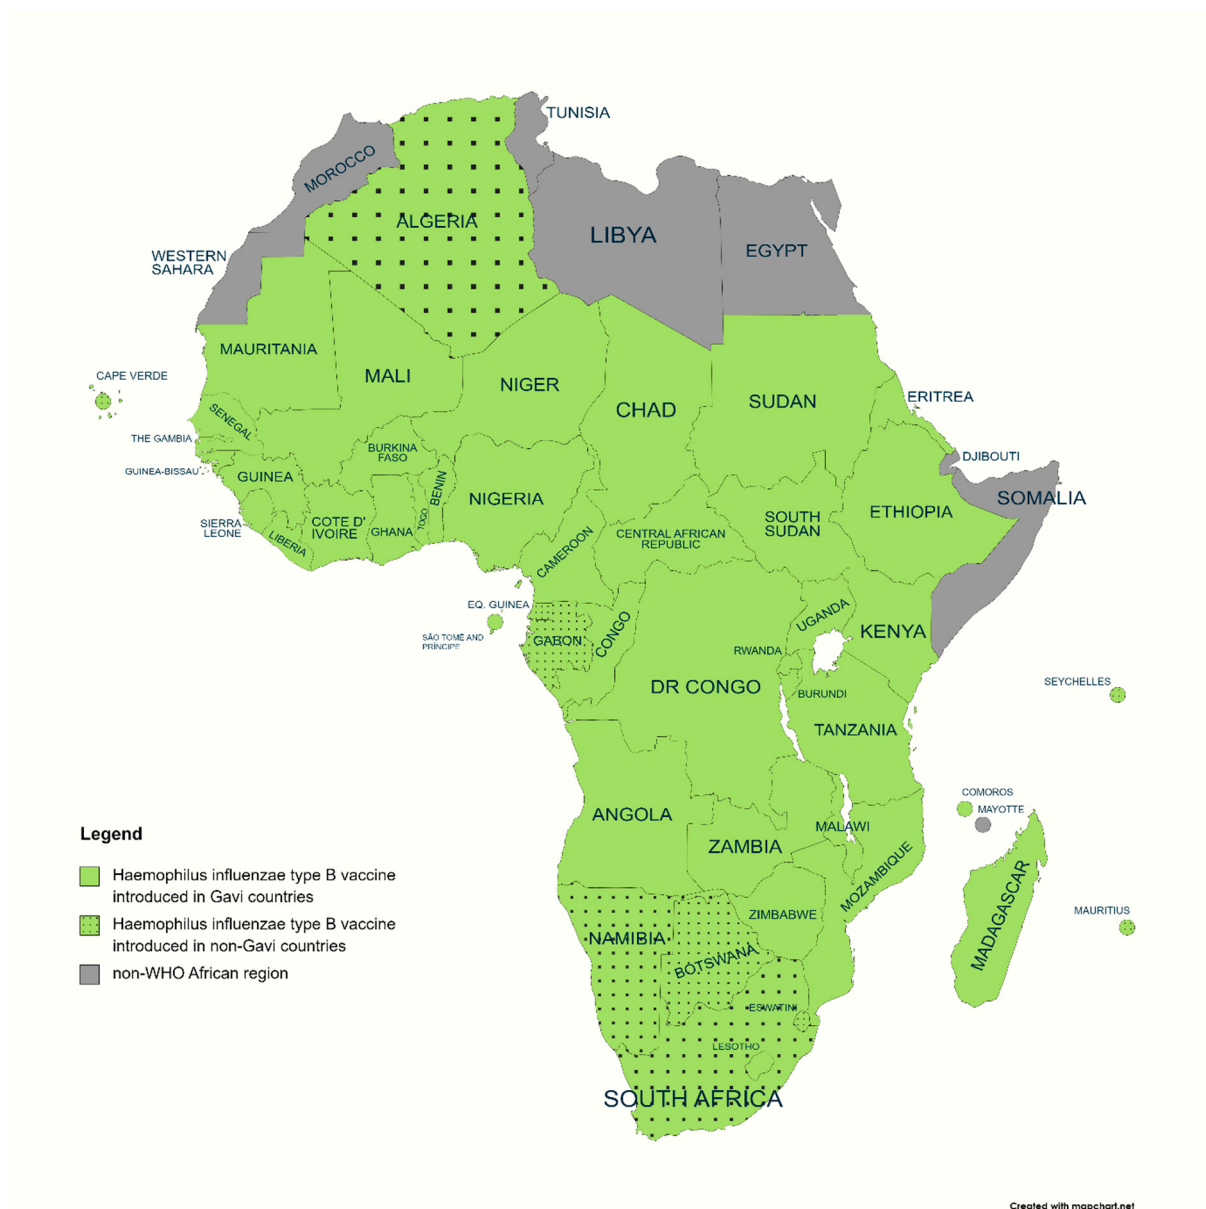

**Figure S2.** Status of Hib vaccine introduction in the WHO African region as of May 2022.

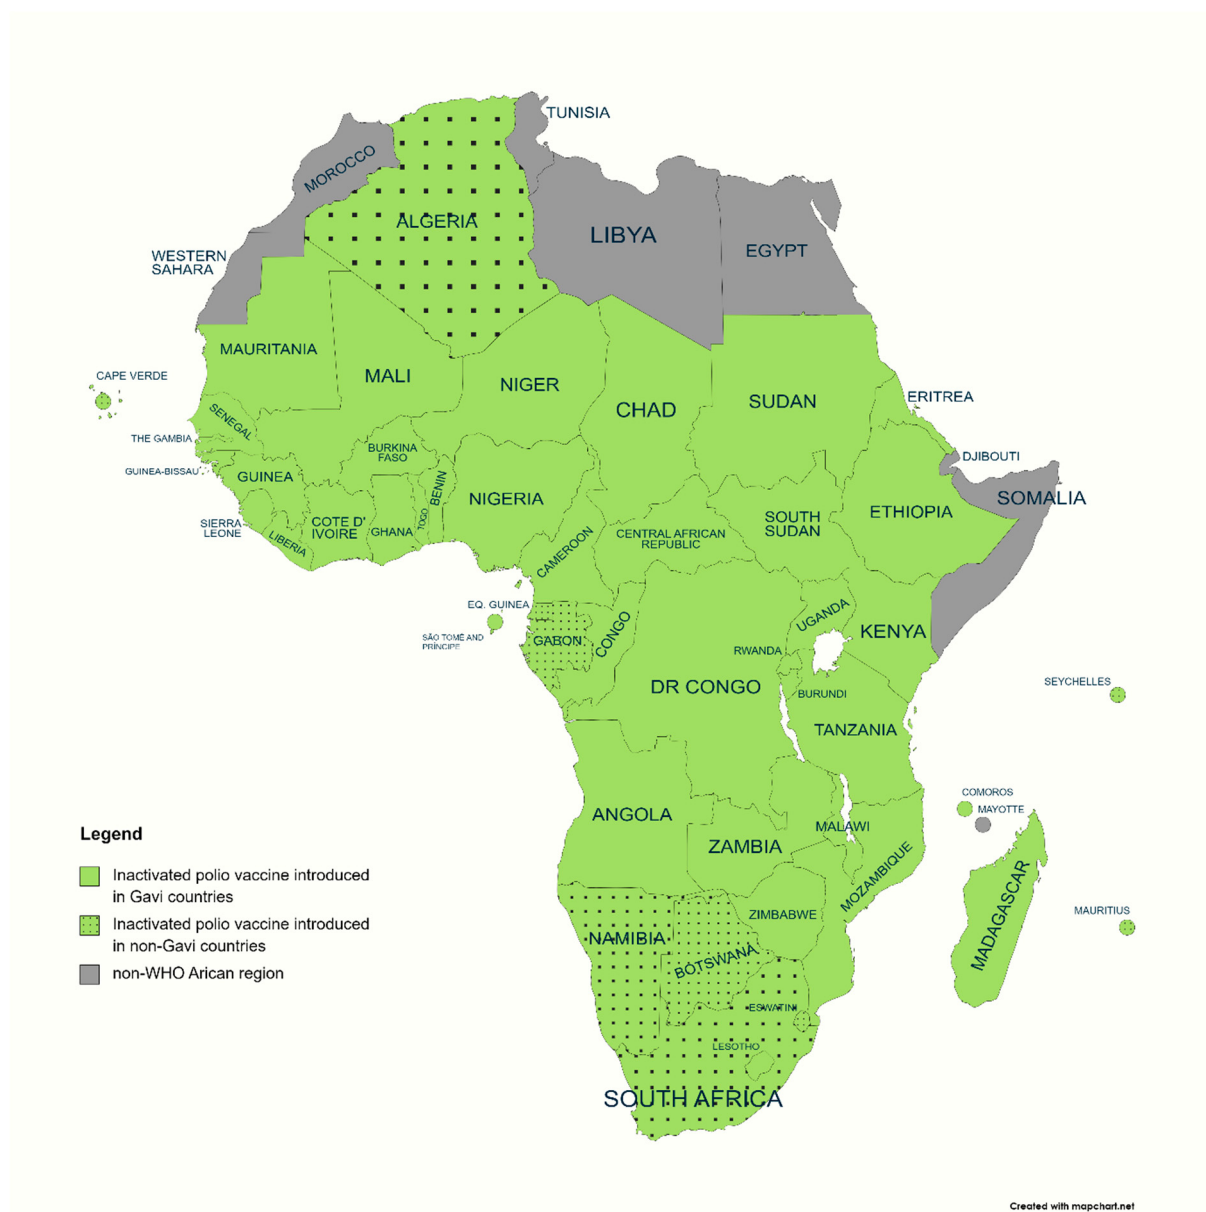

**Figure S3.** Status of IPV introduction in the WHO African region as of May 2022.

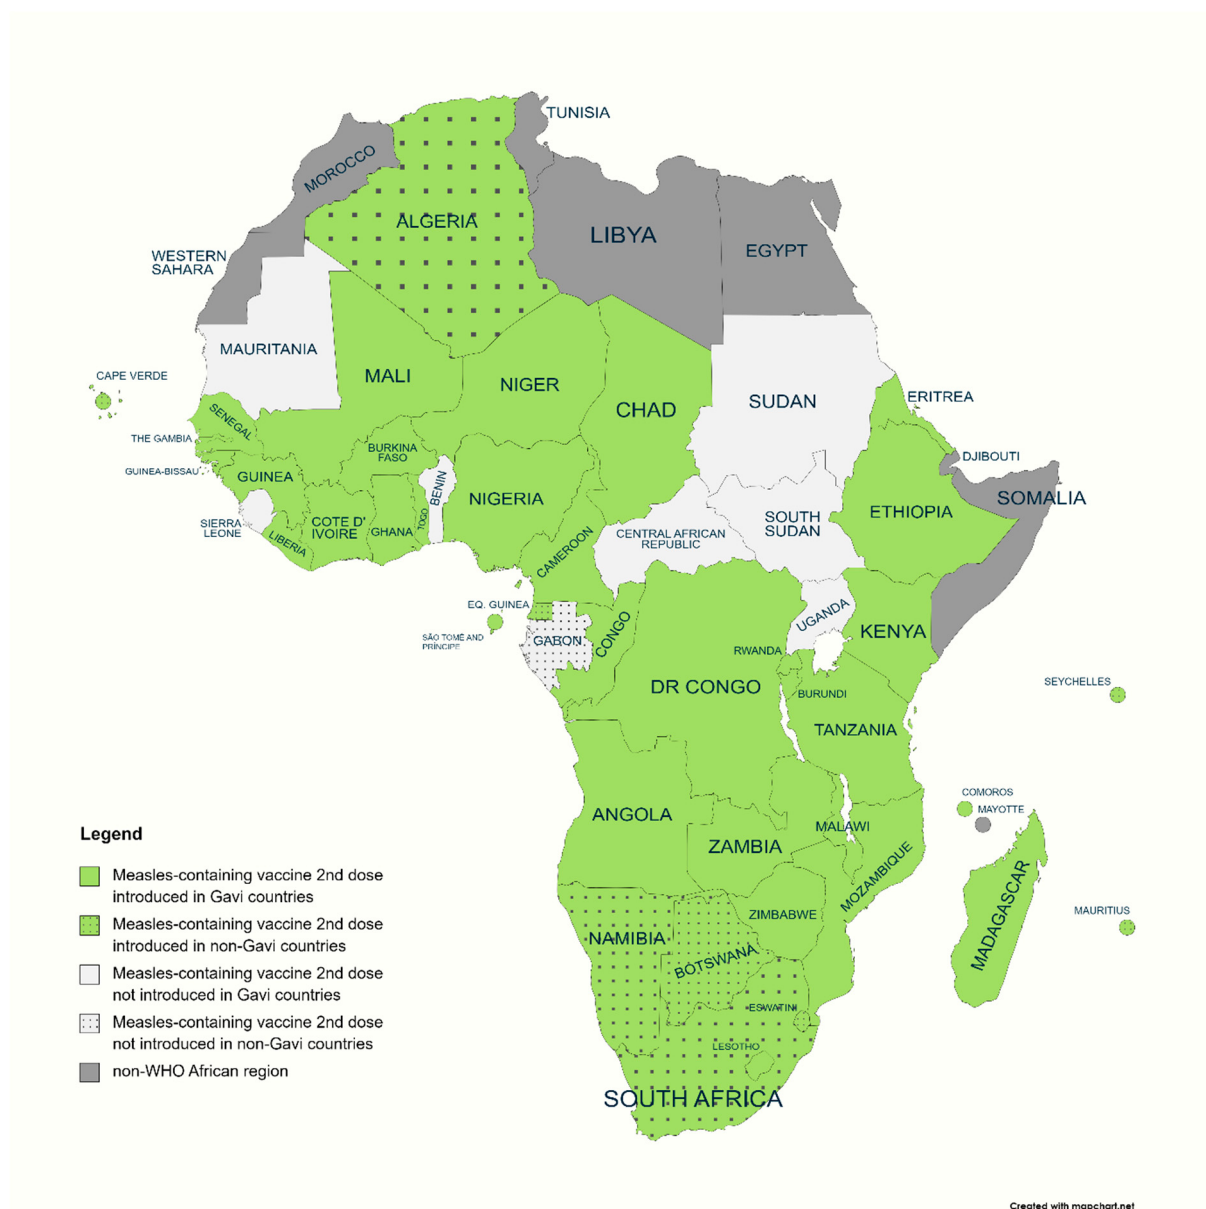

**Figure S4.** Status of MCV2 introduction in the WHO African region as of May 2022.

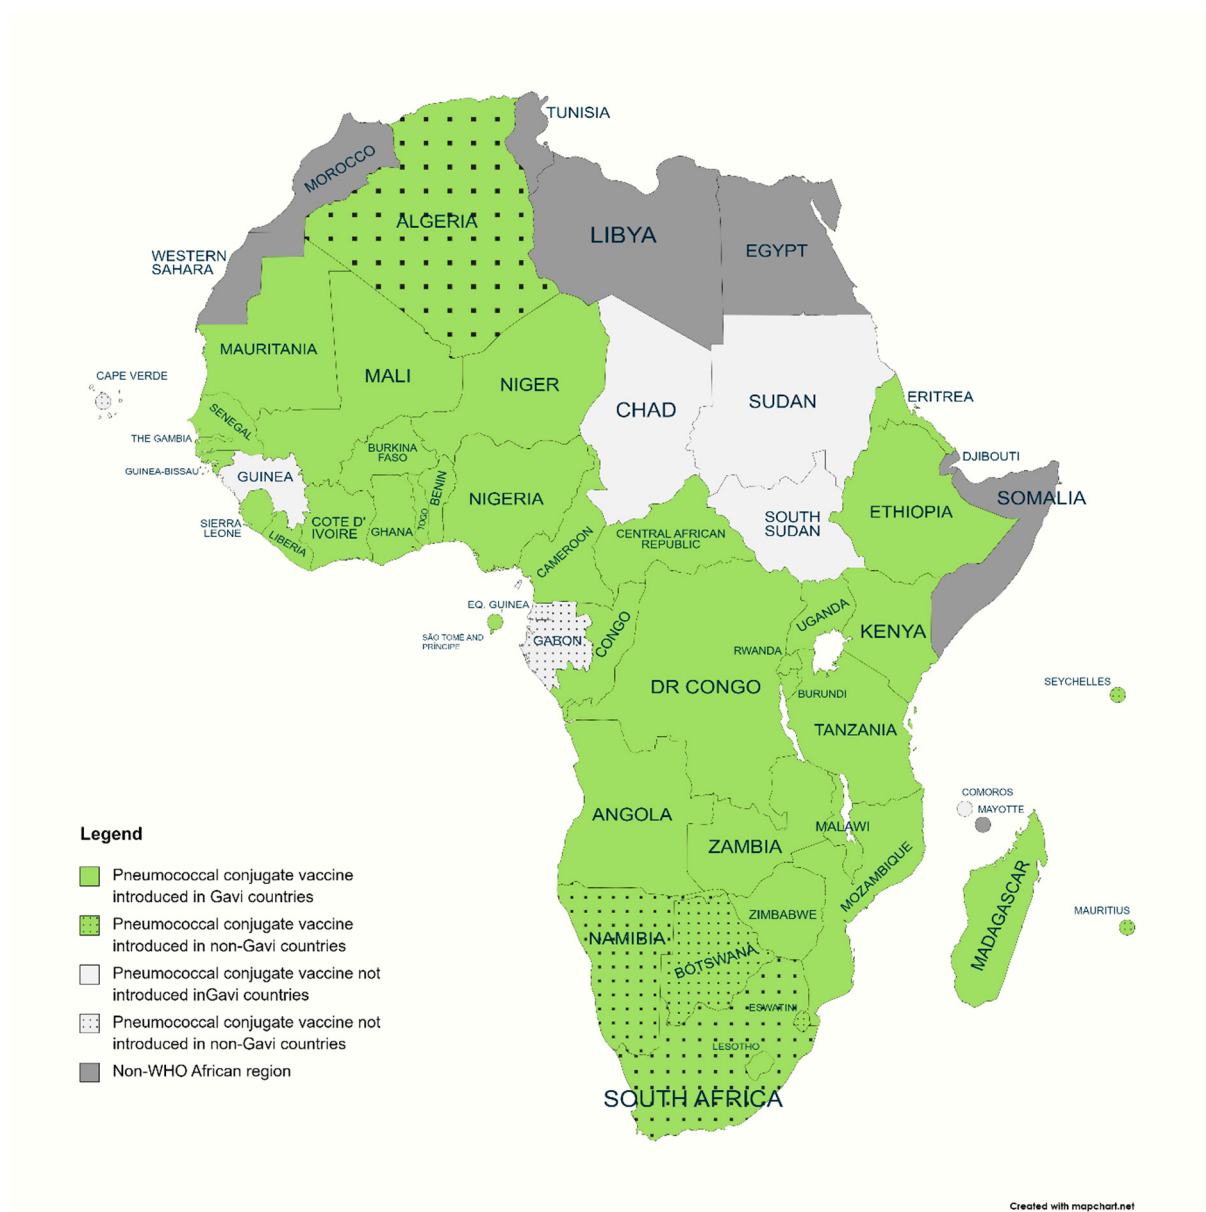

**Figure S5.** Status of PCV introduction in the WHO African region as of May 2022.

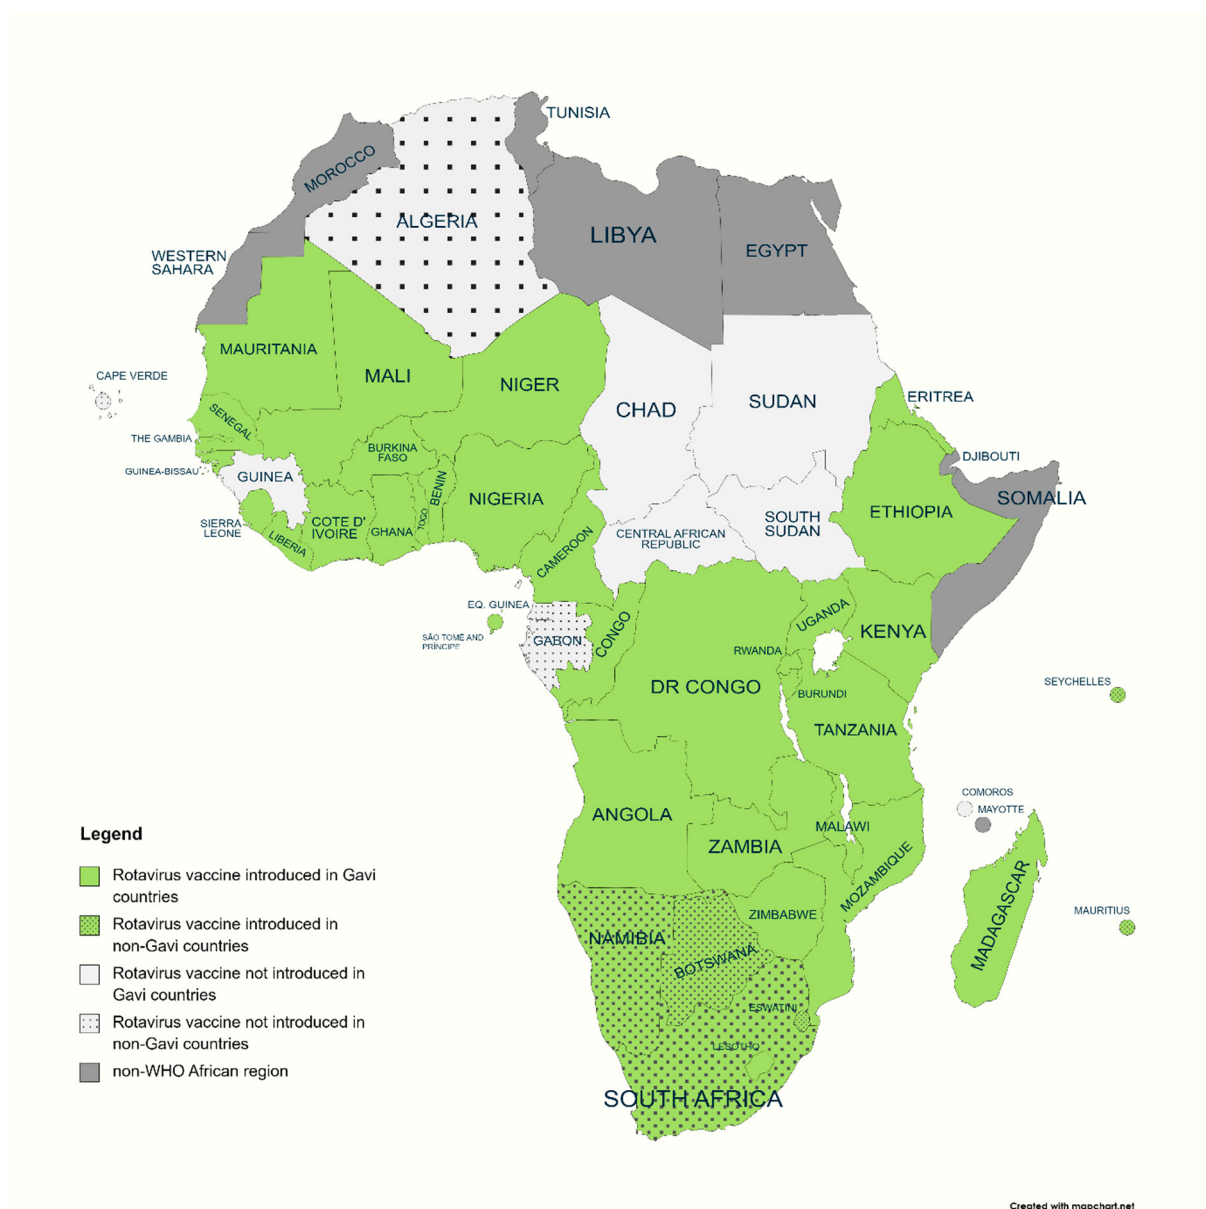

**Figure S6.** Status of rotavirus vaccine introduction in the WHO African region as of May 2022.

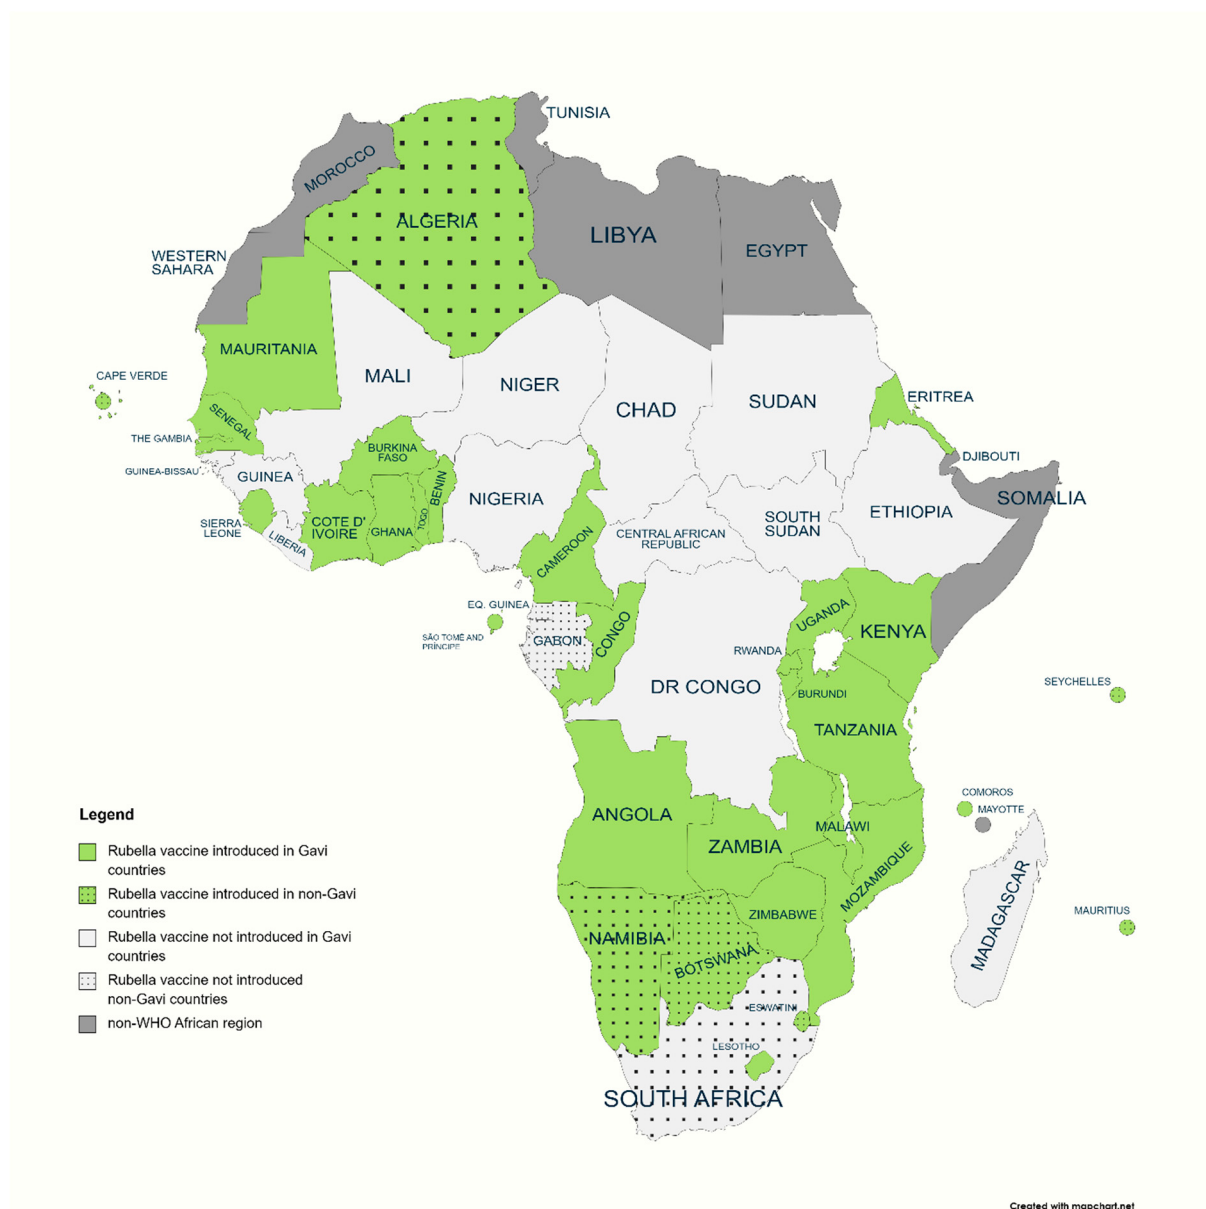

**Figure S7.** Status of rubella vaccine introduction in the WHO African region as of May 2022.

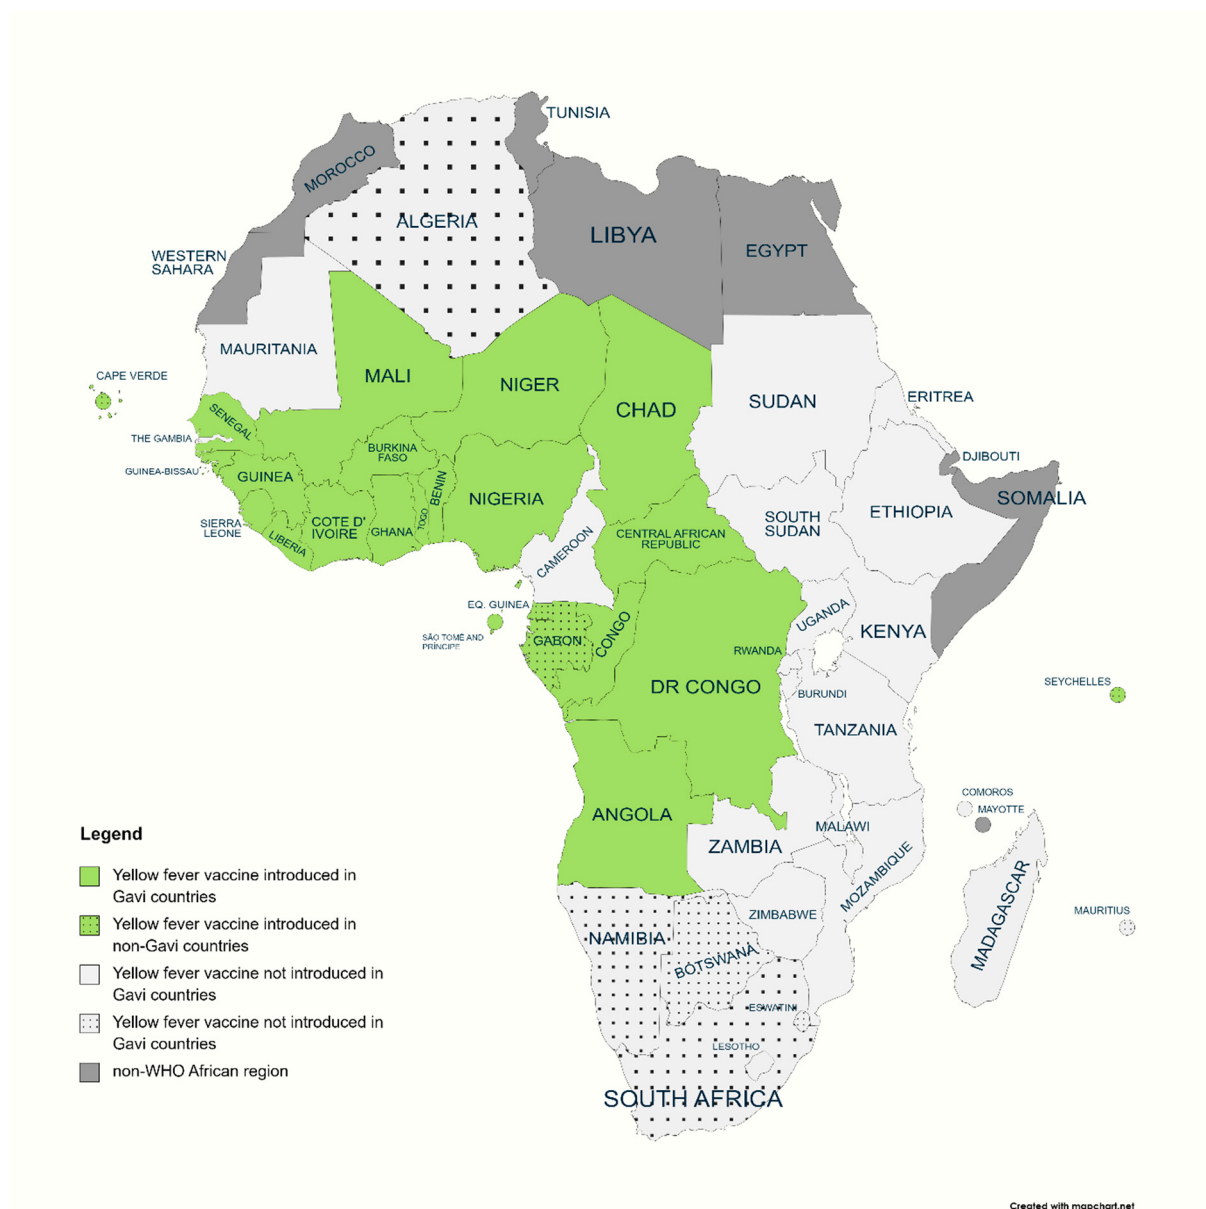

**Figure S8.** Status of yellow fever vaccine introduction in the WHO African region as of May 2022.

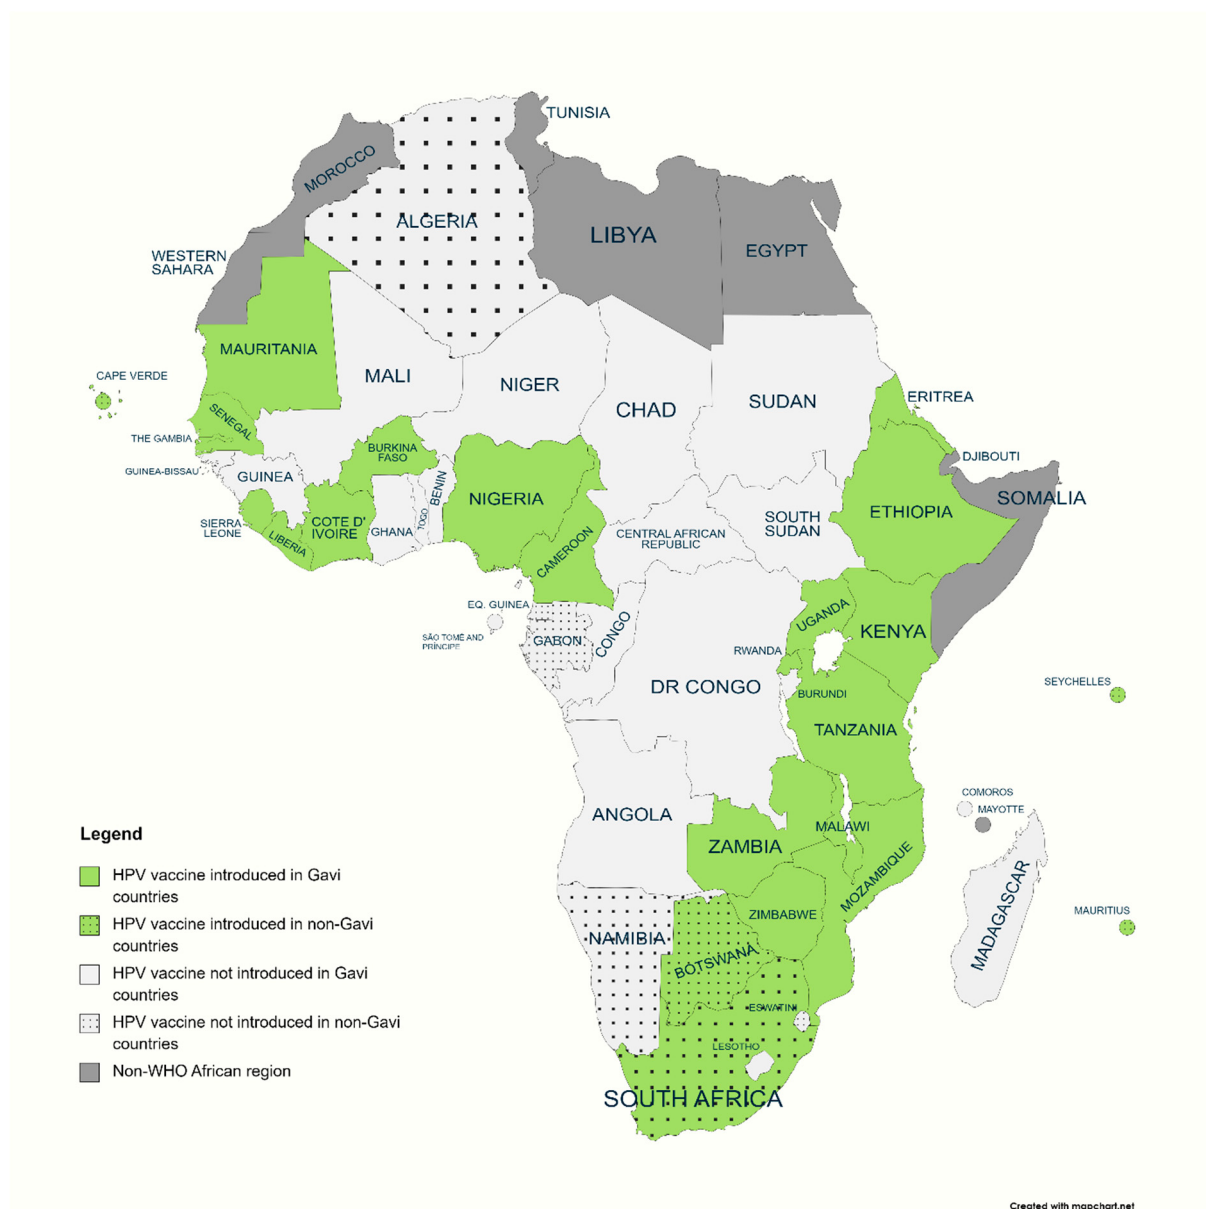

**Figure S9.** Status of HPV vaccine introduction in the WHO African region as of May 2022\*

(\*HPV has just been introduced in Nigeria as of October 2023).

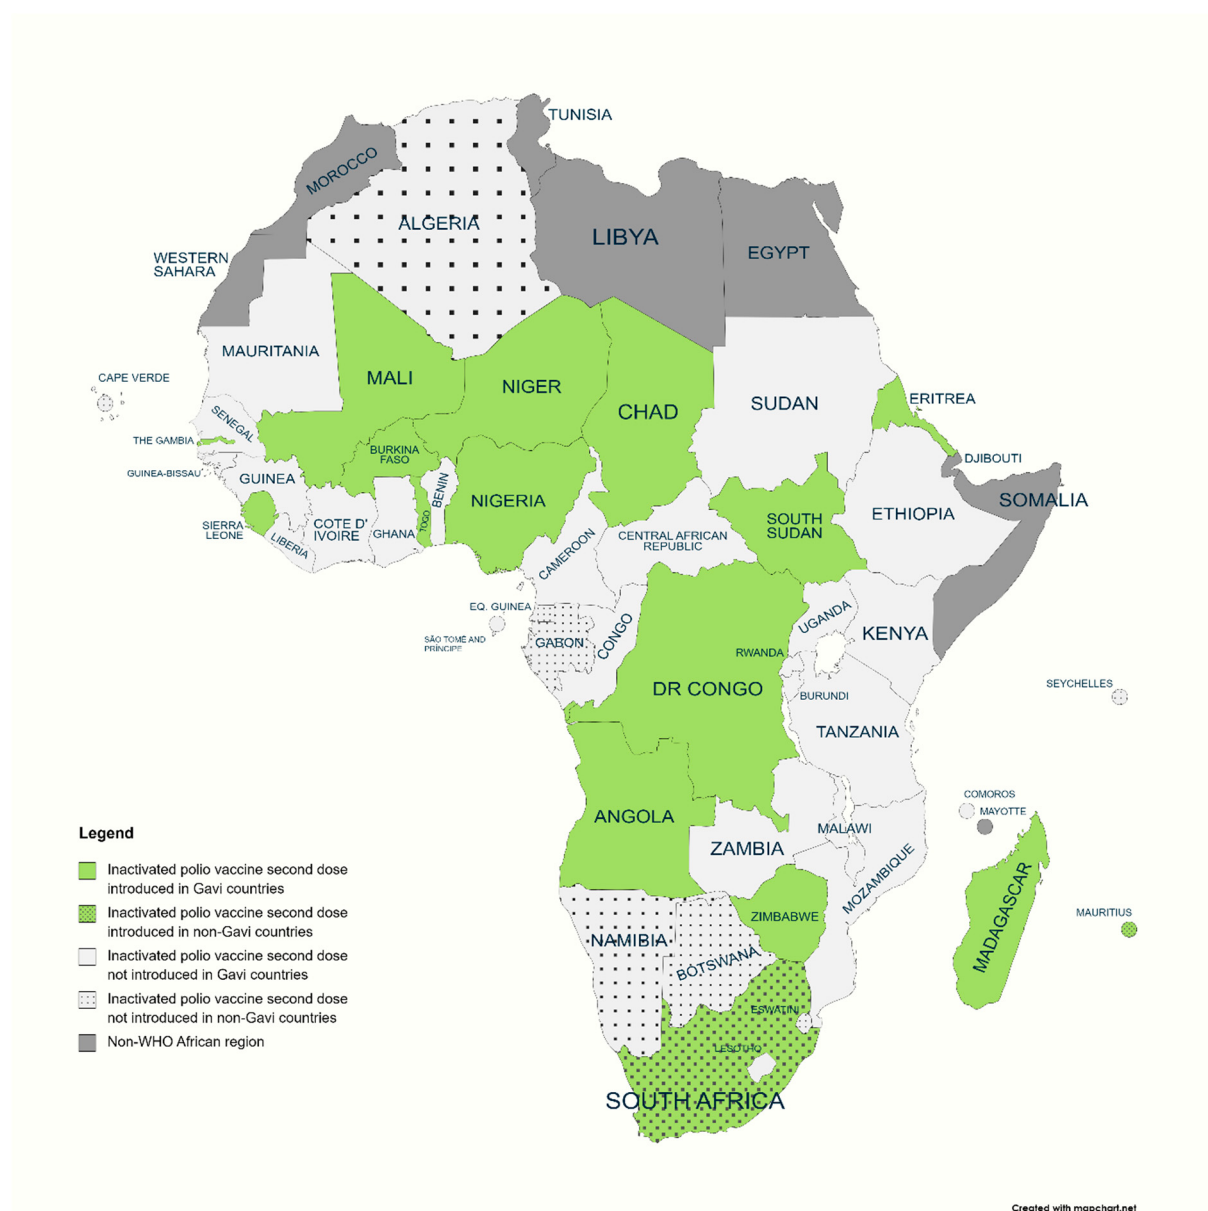

**Figure S10.** Status of IPV2 introduction in the WHO African region as of May 2022.

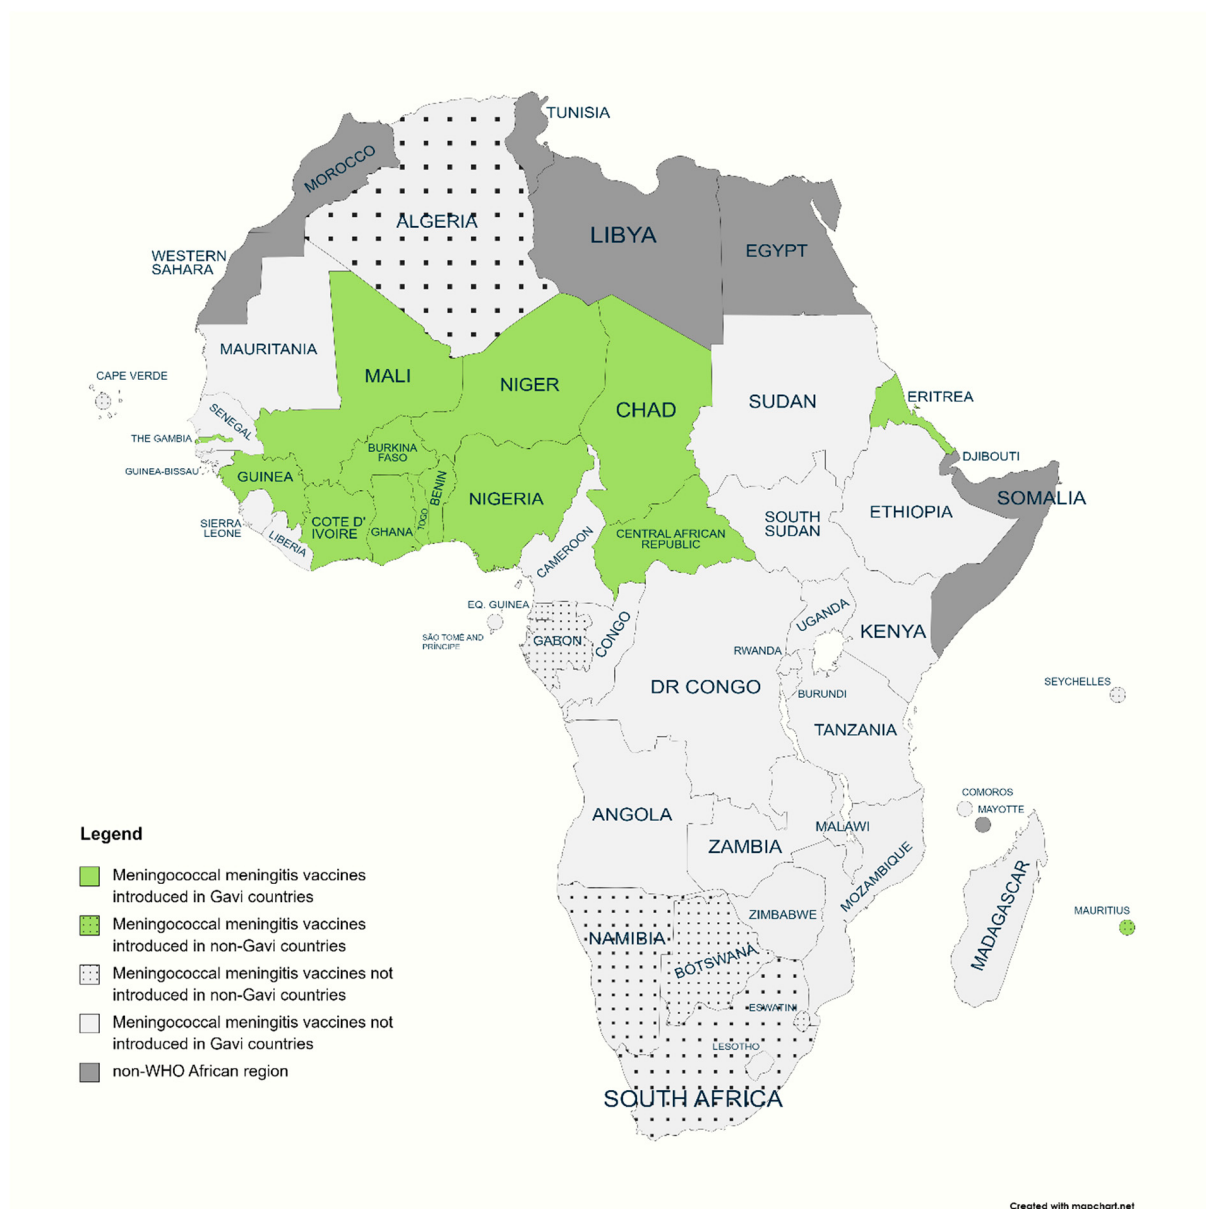

**Figure S11.** Status of meningococcal meningitis vaccine introduction in the WHO African region as of May 2022.

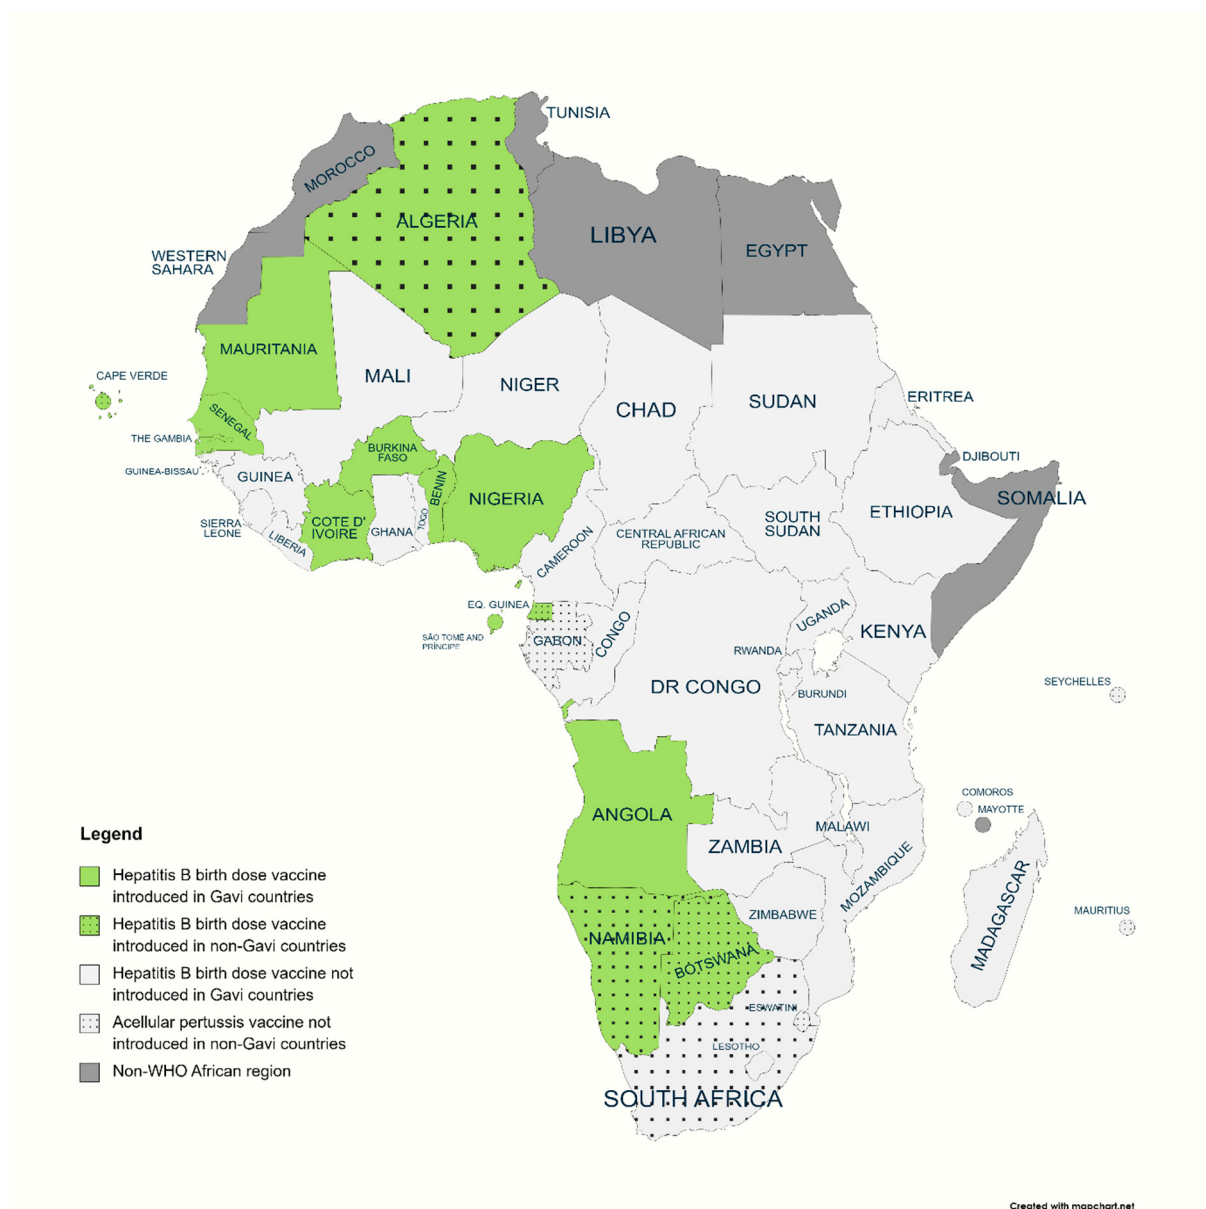

**Figure S12.** Status of HepB birth dose vaccine introduction in the WHO African region as of May 2022.

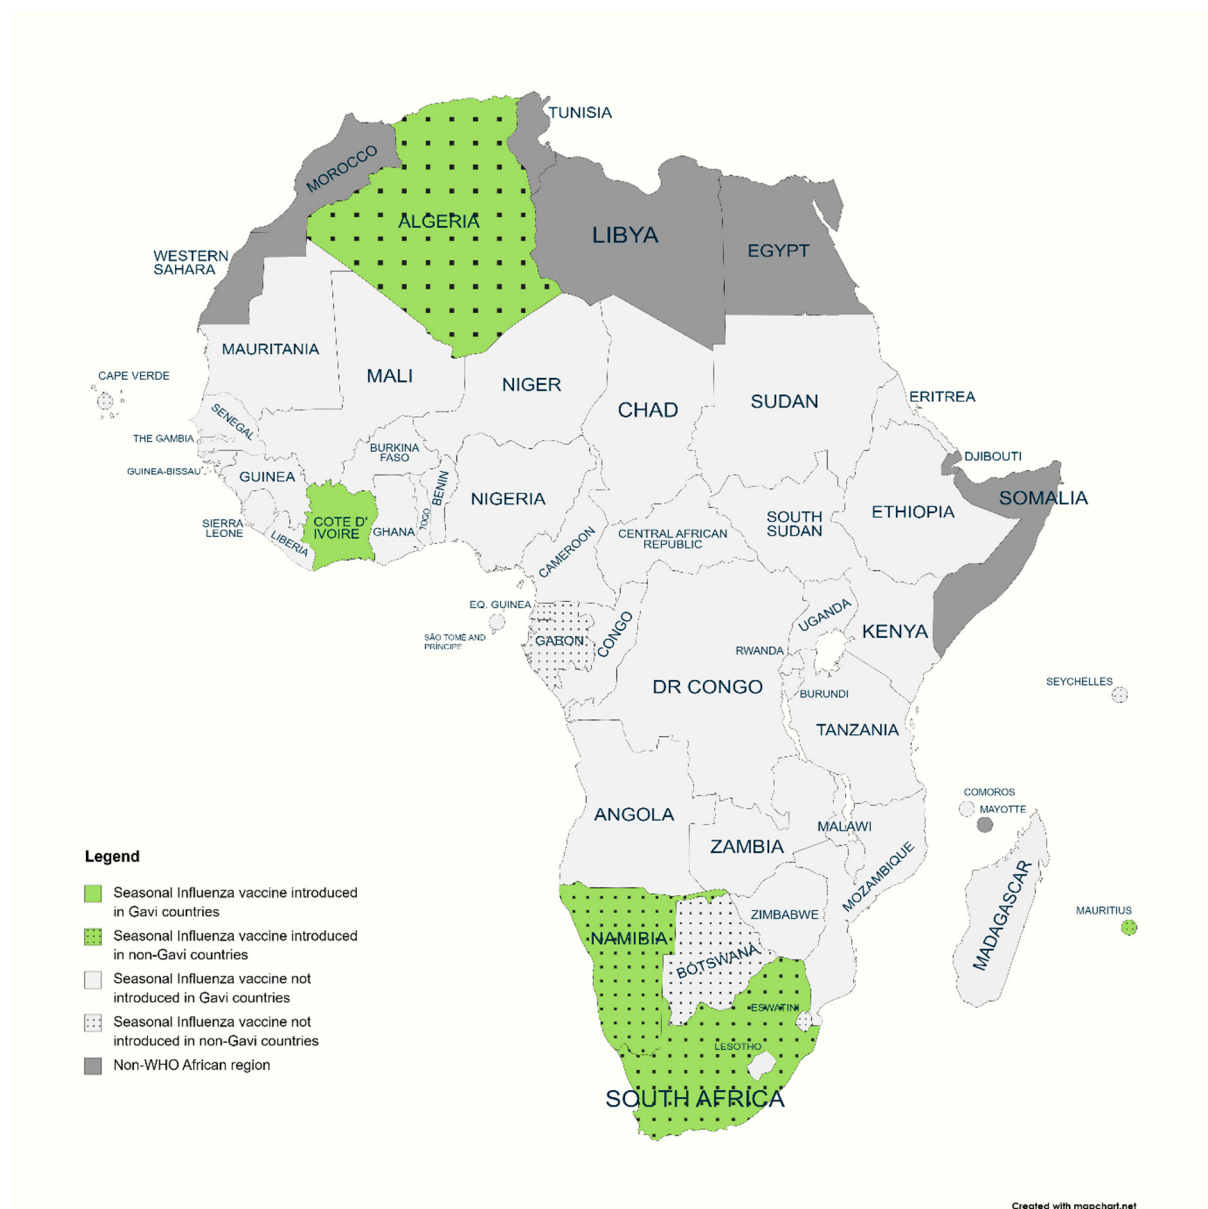

**Figure S13.** Status of seasonal influenza vaccine introduction in the WHO African region as of May 2022.

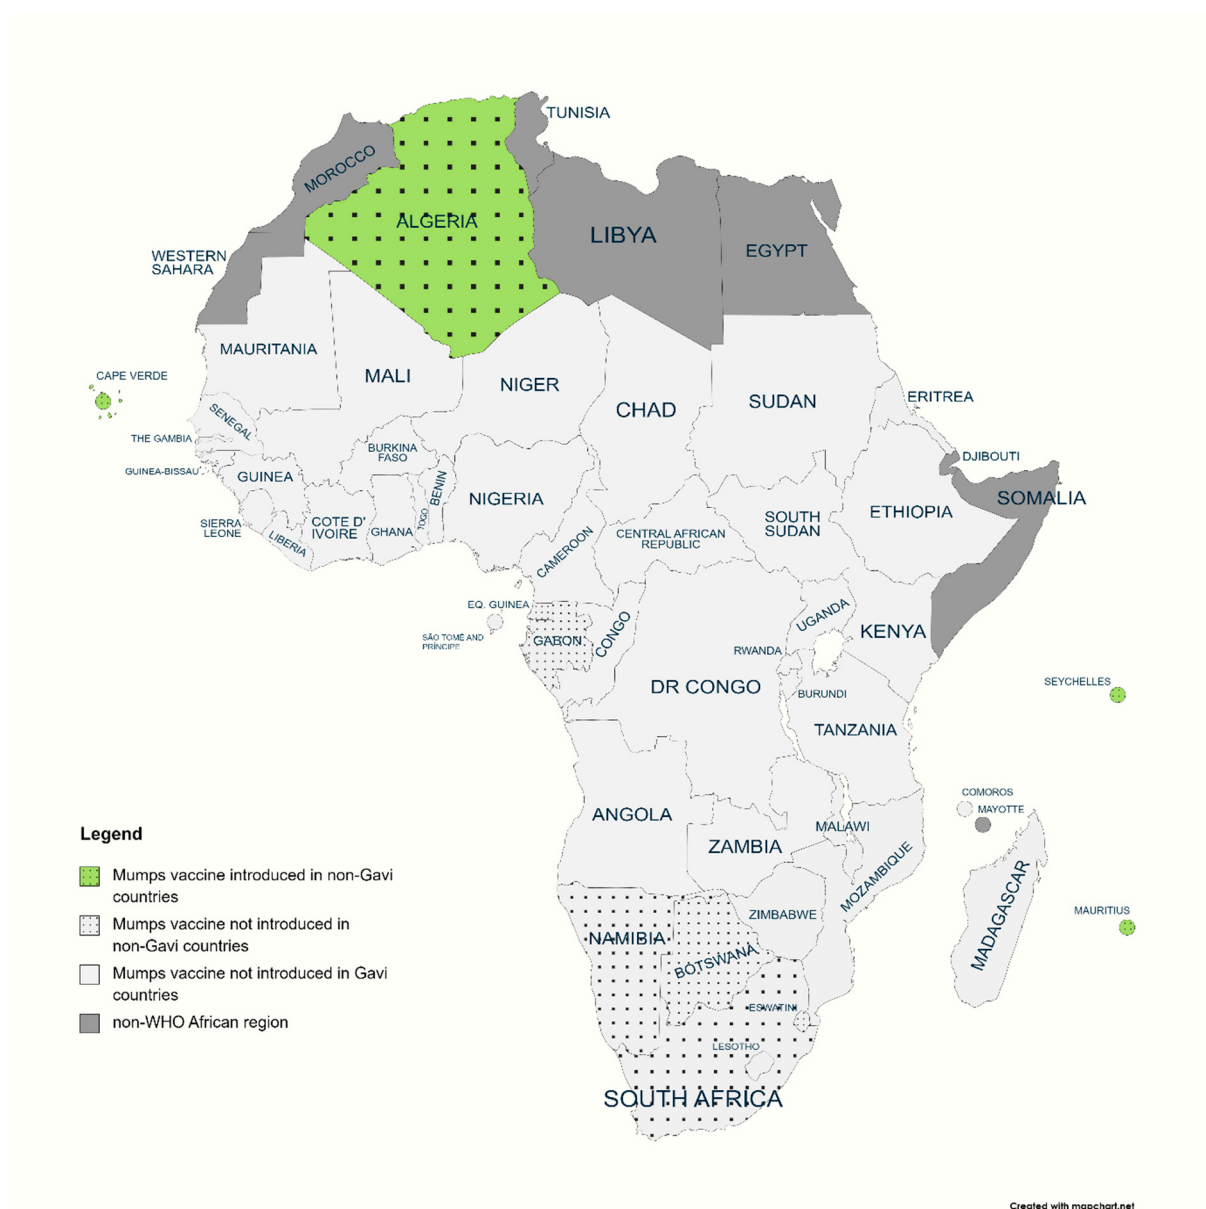

**Figure S14.** Status of mumps vaccine introduction in the WHO African region as of May 2022.

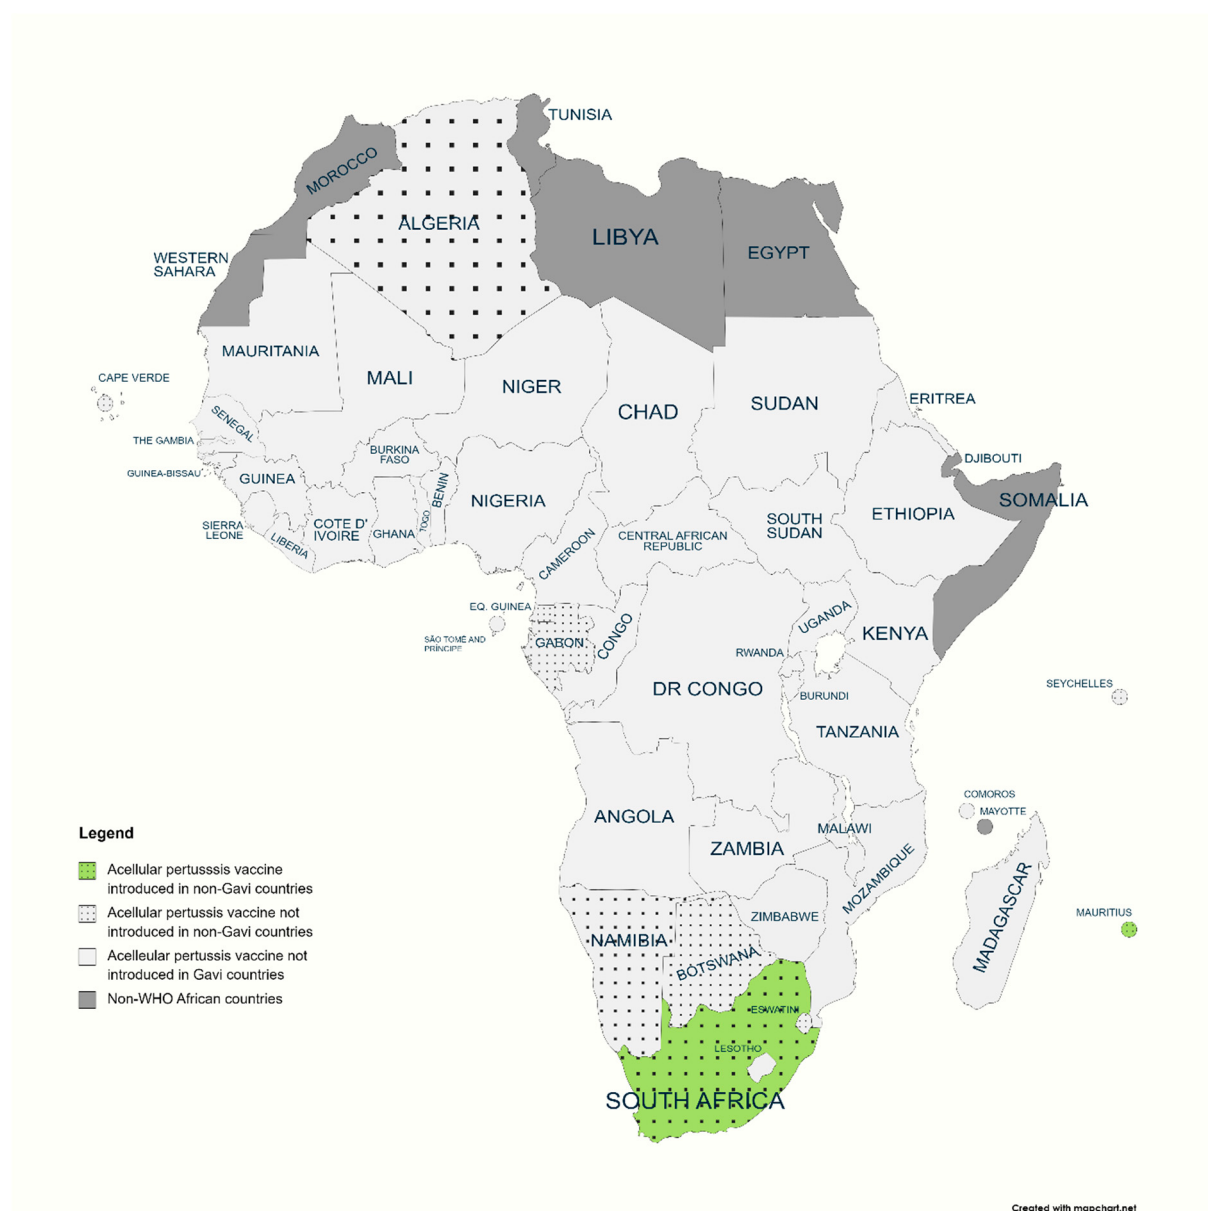

**Figure S15.** Status of acellular vaccine introduction in the WHO African region as of May 2022.

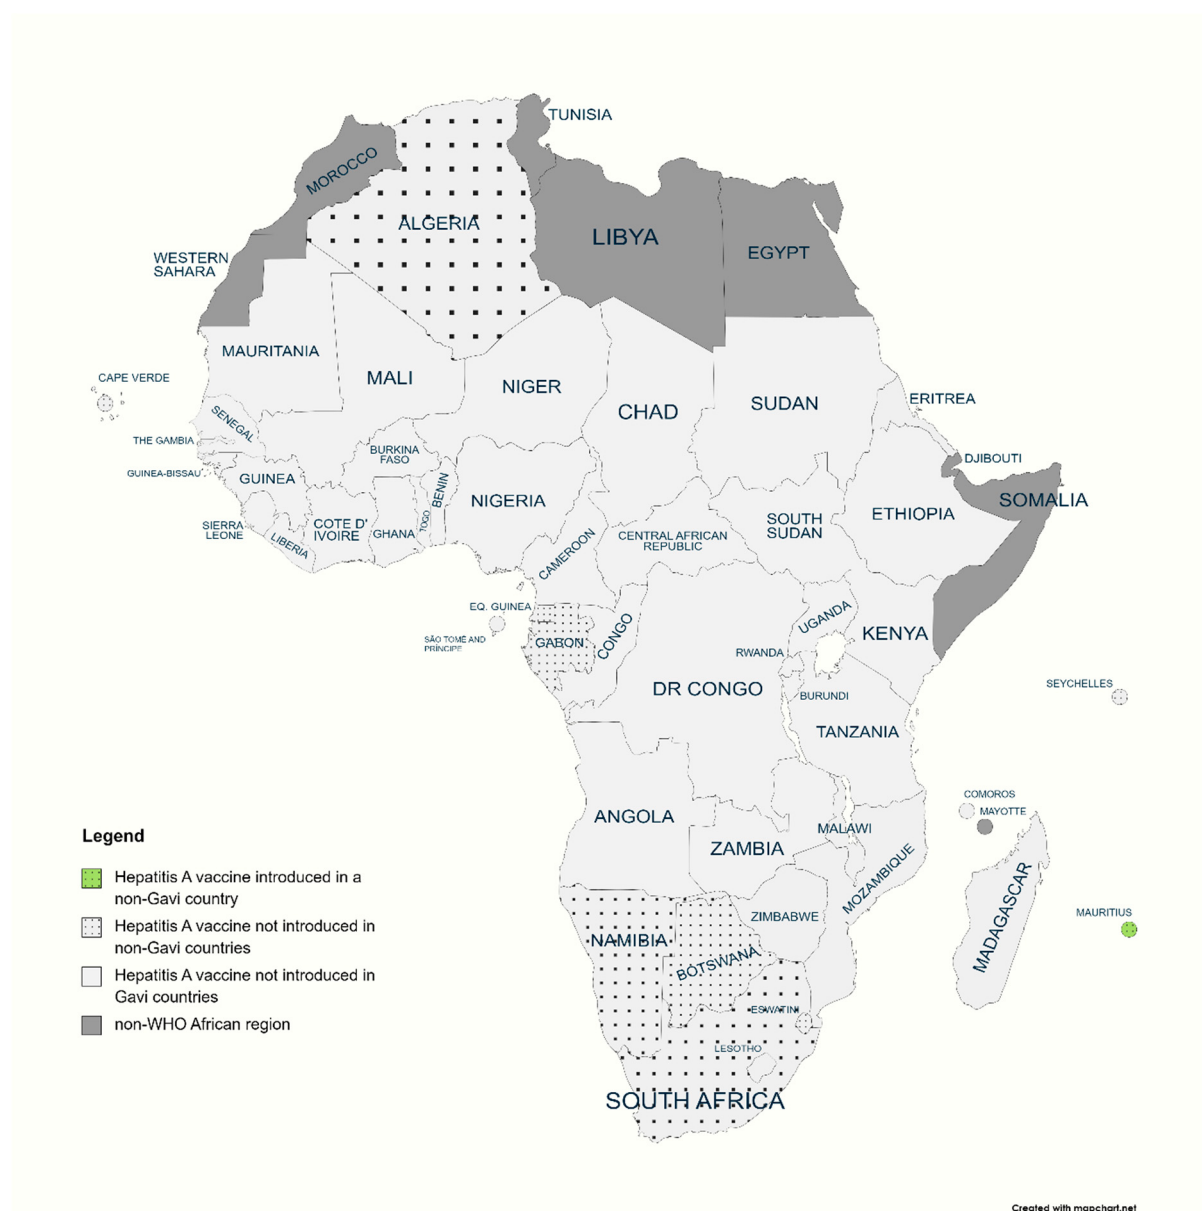

**Figure S16.** Status of hepatitis A vaccine introduction in the WHO African region as of May 2022.
