# Supplementary material for: New Vaccine Introductions in WHO African Region between 2000 and 2022
Source: MDPI journal article supplement (doi:10.3390/vaccines11111722), 2023-11-16
Supplement: s1 [file s1]

**Supplementary Table S1. Summarises the number of Gavi eligible and ineligible countries that have introduced each new vaccine.**

| Vaccines                                        | Gavi eligible (n = 37) | Gavi ineligible (n=10) |
|-------------------------------------------------|------------------------|------------------------|
| aP (acellular pertussis) vaccine                | 0                      | 0                      |
| Hepatitis A vaccine                             | 0                      | 1                      |
| Hepatitis B vaccine                             | 37                     | 10                     |
| HepB birth dose                                 | 9                      | 5                      |
| Hib (Haemophilus influenzae type B) vaccine     | 37                     | 10                     |
| HPV (Human Papilloma Virus) vaccine             | 18                     | 5                      |
| IPV (Inactivated polio vaccine)                 | 37                     | 10                     |
| IPV (Inactivated polio vaccine) 2nd dose        | 14                     | 2                      |
| Measles-containing vaccine 2nd dose             | 32                     | 9                      |
| Meningococcal meningitis vaccines (all strains) | 13                     | 1                      |
| Mumps vaccine                                   | 0                      | 4                      |
| PCV (Pneumococcal conjugate vaccine)            | 33                     | 7                      |
| Rotavirus vaccine                               | 32                     | 6                      |
| Rubella vaccine                                 | 25                     | 7                      |
| Seasonal Influenza vaccine                      | 1                      | 4                      |
| YF (Yellow fever) vaccine                       | 21                     | 4                      |
| Japanese encephalitis                           | 0                      | 0                      |
